# Supplementary material
Source: PubMed Central journal article supplement (PMC4817928)
Supplement: mt2015115x2.pdf [file mt2015115x2.pdf]

**Figure S2**

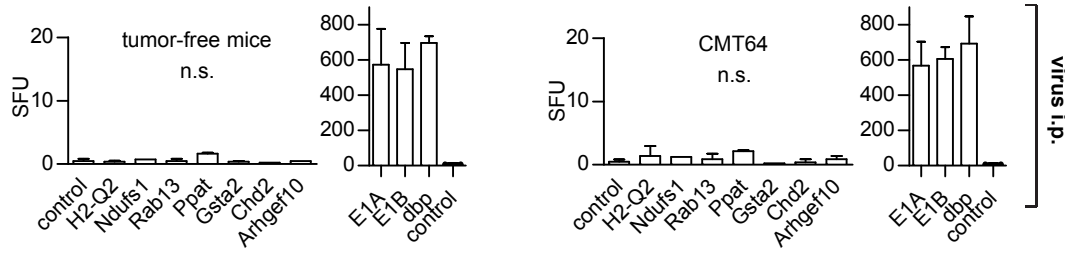

**Fig. S2a** Characterization of neopeptide-specific CD8 T cell responses. Virotherapy induced T cell responses do not cross-react with viral responses. To analyze cross-reactivity of virus-specific CD8 T-cell responses, tumor-free mice and mice with subcutaneous tumors received intraperitoneal injections of hTertAd to induce virus-specific T-cell responses thereby circumventing oncolysis. Neopeptide-directed responses were investigated by ELISpot. Results show representative data from n=5 mice per group.

| gene name | mutation | min wt sequence | score wt (mut) | MHC-type |
|-----------|----------|-----------------|----------------|----------|
| H2-Q2     | D244E    | TWQLNGEDL       | 23 (25)        | H2-Db    |
| Ndufs1    | V491A    | VAVSNMVQKI      | 28 (29)        | H2-Db    |
| Rab13     | K196N    | SDKKKNKCL       | 12 (22)        | H2-Db    |
| Ppat      | I208M    | DPYGNRPLCI      | 20 (20)        | H2-Db    |
| Gsta2     | Y9H      | LHYFNARGRM      | 22 (22)        | H2-Db    |
| Chd2      | T647A    | TPLQNSLKEL      | 26 (27)        | H2-Db    |
| Arhgef10  | M207I    | AWMENPEEAI      | 26 (28)        | H2-Db    |

**Fig. S2b.** The SYFPEITHI-score for wildtype peptides used in figure 1d is listed.

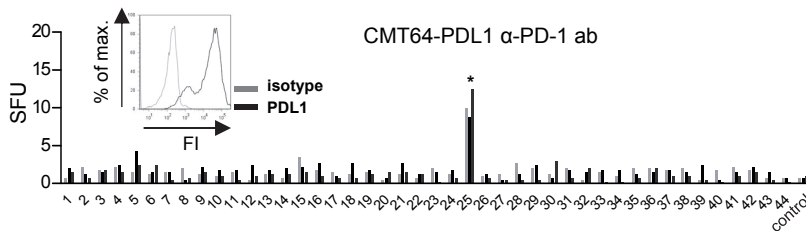

**Fig. S2c.** Expression of PD-L1 does not inhibit the neopeptide-specific response upon PD-1 blockade. To investigate the role of PD-L1 on mutanome-specific immune responses in an isogenic experimental setup, CMT64-PDL1 cells were generated by retroviral gene transfer of pQC-PDL1 using standard methods. Mice with CMT64-PDL1 were treated with αPD-1 antibody as described in Fig. 1B and screened for neoantigen-specific CD8 T-cell responses by IFNγ-ELISpots. The graph shows three representative mice from n=6. All mice treated with PD-1 ab developed a significant response to Ndufs1-V491A.

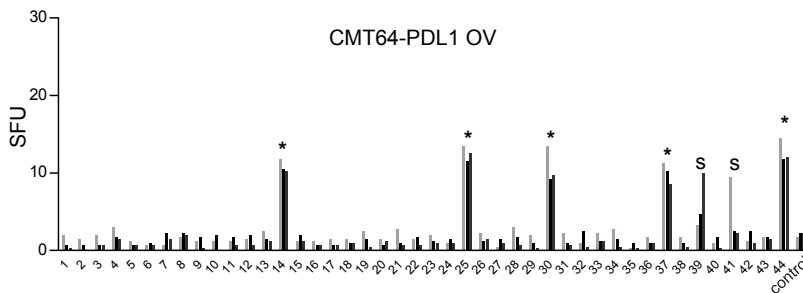

**Fig. S2d.** Expression of PD-L1 does not inhibit the neopeptide-specific response upon virotherapy. Mice with CMT64-PDL1 tumors received intratumoral treatment with hTert Ad as described in figure 1B. The graph shows representative results of three mice from a group of n=8.
