# Supplementary material
Source: PubMed Central journal article supplement (PMC4817928)
Supplement: mt2015115x3.pdf [file mt2015115x3.pdf]

### Figure S3

| Tumor-associated epitopes of CMT64 induced by PD-1 blockade and virotherapy (≥50% of responsive mice) |                                                    |          |                  |       |          |
|-------------------------------------------------------------------------------------------------------|----------------------------------------------------|----------|------------------|-------|----------|
| gene i.d.                                                                                             | gene name                                          | mutation | minimal sequence | score | MHC-type |
| NM_010872                                                                                             | NLR family, apoptosis inhibitory protein 2 (Naip2) | Y540N    | CPLLNRFL         | 22    | H2-Db    |
| NM_172967                                                                                             | Lung adenoma susceptibility 2 (Las2)               | I94T     | HTPDNAFVNL       | 26    | H2-Db    |
| NM_016701                                                                                             | Nestin (Nes)                                       | S570L    | SIEENLGTV        | 22    | H2-Db    |

**Fig. S3a** A table listing the epitopes that were specifically triggered by combination therapy in at least 50% of responding mice.

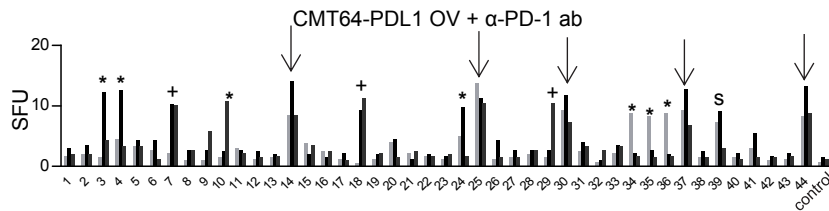

**Fig. S3b** PD-L1-expression by CMT64 tumors does not affect epitope spreading upon combined treatment. The same experimental setup as in Fig. 4B for the combined treatment was applied in mice bearing CMT64-PDL1 tumors (n=8 treated animals). In total, strong expansion of mutanome-specific responses was detected in 9 out of 16 treated animals (8 animals bearing CMT64-tumors, another 8 animals bearing CMT64-PDL1-tumors).
