# Supplementary material
Source: PubMed Central journal article supplement (PMC4817928)
Supplement: mt2015115x4.pdf [file mt2015115x4.pdf]

Figure S4

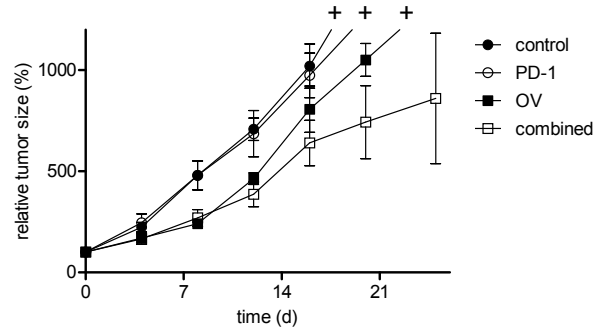

**Fig. S4** Growth of the primary tumor following virotherapy and/or PD-1 inhibition. Mice bearing subcutaneous CMT64 tumor and lung colonies were treated as described in Figure 5, when tumor-volume reached about 100 $\mu$ l (n=5 animals per group). Untreated mice served as control. The size of the primary tumor was monitored. Groups marked with '+' were terminated due to the tumor burden.
