# Supplementary material
Source: PubMed Central journal article supplement (PMC4817928)
Supplement: mt2015115x6.pdf [file mt2015115x6.pdf]

Table S1

| no. | gene i.d.    | gene name | mutation | 25mer peptide sequence              | min. predicted epitope | MHCI  | SYFPEITHI score (>19) |
|-----|--------------|-----------|----------|-------------------------------------|------------------------|-------|-----------------------|
| 1.  | NM_172393    | Aim1      | R893H    | LKVFNFNSSNTSR <b>L</b> GGSSHMEKYPQK | F N S S N T S R L      | H2-Db | 25                    |
| 2.  | NM_001242396 | Jmjd1c    | L1715P   | VKGQPHDHKHLMP <b>T</b> QIIPGSVLTDL  |                        |       |                       |
| 3.  | NM_008787    | Pent      | A2385V   | AKDNLQKELQIEV <b>S</b> RCEALLAQEKG  |                        |       |                       |
| 4.  | NM_029134    | Lrriq1    | T274S    | IRNLHLKMEEER <b>S</b> RSELQEKEKAR   |                        |       |                       |
| 5.  | NM_001146707 | Nap1l1    | E57K     | DVEEVEEETG <b>E</b> KTKIKARQLTVQM   |                        |       |                       |
| 6.  | NM_025706    | Tbc1d15   | I586V    | INELSMKIDVED <b>V</b> LCKAEAISLQMA  |                        |       |                       |
| 7.  | NM_134010    | Nup107    | H128N    | SSQRLGLYTN <b>T</b> ENHSMTEDVNLSTV  |                        |       |                       |
| 8.  | NM_001162905 | Mdm1      | S403L    | STRRLEMPEPAAL <b>V</b> RRKLAWDAEES  |                        |       |                       |
| 9.  | NM_001162905 | Mdm1      | D437G    | RAEEDGREERG <b>Q</b> GQTCAVELEKPD   |                        |       |                       |
| 10. | NM_030207    | Sfi1      | E1110G   | QLLPGDSISTR <b>T</b> GPVYGSEATGHT   |                        |       |                       |
| 11. | NM_001199274 | Mat2b     | T302I    | ETLGIGQRTPF <b>R</b> IGIKESLWPFLLID |                        |       |                       |
| 12. | NM_013552    | Hmmr      | T414K    | LEEETKSTAE <b>Q</b> LKRLDNLLREKEVE  |                        |       |                       |
| 13. | NM_013552    | Hmmr      | A153S    | LTELTRANELL <b>K</b> SKFSEDPGHQKNMR |                        |       |                       |
| 14. | NM_013552    | Hmmr      | N148K    | SLEKRLTEL <b>T</b> RAKELLSKFSEDPGH  |                        |       |                       |
| 15. | NM_013552    | Hmmr      | A94V     | DKDVKRLEKEI <b>R</b> VLLQERGTQDKRI  |                        |       |                       |
| 16. | NM_009831    | Ccng1     | S9A      | MIEVLTT <b>D</b> AQKLLHQLNTLLE      |                        |       |                       |
| 17. | NM_013917    | Pttg1     | R16S     | LIFVDKDNEEP <b>G</b> SRLASKDGLKLG   |                        |       |                       |
| 18. | NM_001045520 | Clint1    | N446S    | SSQSMNFS <b>L</b> MSTSTVGLGLPMSRSQ  |                        |       |                       |
| 19. | NM_001024846 | Zfp62     | L123S    | GNVHPAHIAD <b>K</b> SHKCDECGKSFKY   |                        |       |                       |
| 20. | NM_001024846 | Zfp62     | R172H    | TFRSSSLRV <b>H</b> KHIHTGEKPYKDE    |                        |       |                       |
| 21. | NM_001163671 | Mapk9     | R309Q    | LLSKMLVIDP <b>D</b> KQISVDEALRHPYI  |                        |       |                       |
| 22. | NM_029745    | Tbc1d9b   | I73T     | ILHQ <b>T</b> QDSQVYWTVACGSSRKEITK  |                        |       |                       |
| 23. | NM_001110499 | Canx      | V560G    | E <b>E</b> KQKSDAEEDGGTGSQDEEDSKPK  |                        |       |                       |
| 24. | NM_009329    | Zfp354a   | V568M    | HRSSLT <b>N</b> HYKIHMD <b>E</b> DP |                        |       |                       |
| 25. | NM_007714    | Clk4      | H42R     | KRRSHS <b>S</b> TQENRRCKPHHQFKDSDC  |                        |       |                       |

|     |              |           |        |                             |                                          |                |          |
|-----|--------------|-----------|--------|-----------------------------|------------------------------------------|----------------|----------|
| 26. | NM_011991    | Cops3     | Q265H  | IKPLSNAYHELAHVYSTNNPSELRN   |                                          |                |          |
| 27. | NM_146019    | Chd3      | I1784F | LHTLWQNEERAAFSSGKLEIWHRR    |                                          |                |          |
| 28. | NM_001078167 | Srsf1     | V185G  | RKLDNTKFRSHEGGYTLILFFGQNW   |                                          |                |          |
| 29. | NM_028276    | Utp14a    | H724D  | KLTA PKVVTKPGDI IKPITAEDVDC |                                          |                |          |
| 30. | NM_008175    | Grn       | C80R   | HHLDGSCQTHGHRPAGYSCLLTVSG   | R P A G Y S C L                          | H2-Kb          | 22       |
| 31. | NM_145436    | Cdc27     | D105N  | SGGVFNKQKSHDNLVTEFGDSACFT   | K S H D N L V T E F                      | H2-Db          | 28       |
| 32. | NM_183016    | Cdc42bpb  | F403L  | FSGHLHLPFIGFTLTTESCFSDRGSL  |                                          |                |          |
| 33. | NM_009239    | Sp4       | H42Q   | NKKPKTSGSQDSQPSPLALLAATCS   | S Q P S P L A L L                        | H2-Db          | 20       |
| 34. | NM_010748    | Lyst      | S1467N | GQNCWPHLSEGFNVSLWFNVEYIHE   | S E G F N V S L W F                      | H2-Db          | 21       |
| 35. | NM_001045535 | Serpinb6e | V313D  | ISYKLLIQWTRLDKMEEEEVQVFLP   |                                          |                |          |
| 36. | NM_009068    | Ripk1     | T473I  | NNGLYNQHGFGTIGTWVYPPNLSQ    |                                          |                |          |
| 37. | NM_026947    | Eci3      | R59Q   | PSQKRGADKAQESKDILVTSEDG     |                                          |                |          |
| 38. | NM_001110332 | Eci2      | R102Q  | PSQKRGADKAQESKDILVTSEDG     |                                          |                |          |
| 39. | NM_145938    | Rpp40     | P185H  | KPLKFDLFLAWHHTGTTEESTMSYF   |                                          |                |          |
| 40. | NM_145938    | Rpp40     | S58N   | IPECGLLSKELKNLVMDIGPYYSVK   | K E L K N L V M D I                      | H2-Db          | 26       |
| 41. | NM_001039188 | Rreb1     | I74V   | EKSSYNCPLEKVCCTTQHQLTMHIR   |                                          |                |          |
| 42. | NM_024242    | Riok1     | L29V   | DDADSSDSENKEVQPIHAEDGGVLL   |                                          |                |          |
| 43. | NM_024242    | Riok1     | I528V  | QAGCRNHIADPDVDKKERKKMVKEA   |                                          |                |          |
| 44. | :NM_023842   | Dsp       | S1166G | LQKARQCEKENLWQKLESEKAIKE    |                                          |                |          |
| 45. | NM_010888    | Ndufs6    | V4A    | MAAALTFRRLTLPR              |                                          | H2-Kb          | 23       |
| 46. | NM_010872    | Naip2     | Y540N  | AFLWASGCCPLLNRFQLVFYLSLSS   | C P L L N R F Q L<br>C P L L N R F Q L V | H2-Db<br>H2-Db | 22<br>20 |
| 47. | NM_001177666 | Gm7120    | Q2L    | MLGMRTRACWFLT               |                                          |                |          |
| 48. | NM_001177666 | Gm7120    | L59F   | IGLGIFCLVADRFLRFPIIQHNDWL   |                                          |                |          |
| 49. | NM_194347    | AY358078  | V378A  | TSDIFGSPVTATAPLAHPNPKPDHV   |                                          |                |          |
| 50. | NM_194347    | AY358078  | S404A  | LCEGEDSKSDLKAAATDSTPRGEQGD  |                                          |                |          |
| 51. | NM_025945    | Polr3d    | G92C   | EKRERDRDRQRECHGRGRGRPEVIQ   |                                          |                |          |
| 52. | NM_177381    | Cog3      | I635V  | IAPFHTEFTIKEVSLDLKKTRDAAF   |                                          |                |          |

|     |              |        |                  |                             |                     |       |    |
|-----|--------------|--------|------------------|-----------------------------|---------------------|-------|----|
| 53. | NM_009429    | Tpt1   | H124Q            | KPFMTGAAEQIKQILANFNNYQFFI   |                     |       |    |
| 54. | NM_001163676 | Abcc4  | T607M            | KDGAPEGQDAENMQAVQPEESRSEG   |                     |       |    |
| 55. | NM_011232    | Rad1   | Q263R            | LSLQYMIRNEDGRICFVEYYCCPDE   | Y M I R N E D G R I | H2-Db | 26 |
| 56. | NM_022816    | Acot10 | T177S            | KFTGHVSWVGNTSMEVKMKMFQLHD   | S W V G N T S M E V | H2-Db | 22 |
| 57. | NM_022816    | Acot10 | L140P<br>N137K   | LVCYMHNNHSTKMSPLSIVTVLVDKID | M H N H N H S T K M | H2-Db | 22 |
| 58. | NM_022816    | Acot10 | I82M             | LPKSQKVLPPRKM RDSYIEVLLPLG  |                     |       |    |
| 59. | NM_001165971 | Gm5803 | F148V<br>D147E   | EIMTDRGSGKKREVAFTVFDHDSVD   |                     |       |    |
| 60. | NM_199449    | Zhx2   | L70P             | TEVVEVKSMGENPSKKLQGGYECKY   | S M G E N P S K K L | H2-Db | 27 |
| 61. | NM_199449    | Zhx2   | M699L            | TLSWLEQYQRHHLSDDRGRDAVSRK   |                     |       |    |
| 62. | NM_144848    | Eppk1  | E3048V           | TMEVKRGHLRGHVVPVWDILTSNYV   |                     |       |    |
| 63. | NM_001033276 | Mll2   | R2358Q           | PPPPESCCAPPQSLPDPFSRVPA     |                     |       |    |
| 64. | NM_011415    | Snai2  | A145G            | LCNKTYSTFSGLGKHKQLHCDAQSR   |                     |       |    |
| 65. | NM_139232    | Fgd4   | I632V            | GFTDSEKKRRGVLEIESAEVSGNS    |                     |       |    |
| 66. | NM_080457    | Muc4   | T804A            | VSPSSQNMSTVSAPIITSTQILSTLP  | S A P I T S T Q I   | H2-Db | 20 |
| 67. | NM_080457    | Muc4   | I1226T<br>P1233L | QNMSTVSAPITSTQILSTLLQSQHT   |                     |       |    |
| 68. | NM_080457    | Muc4   | N1246K           | QSQHTGSKGTSTKPQTTTTPEVTTTS  |                     |       |    |
| 69. | NM_080457    | Muc4   | T1277K           | RDQIQTETSSQRKISPGETTTSHAP   |                     |       |    |
| 70. | NM_080457    | Muc4   | L1347I           | PSSQNMTTTS SHAIMSSAPSTHML   |                     |       |    |
| 71. | NM_080457    | Muc4   | E1864Q           | SSTHMLSTASSTQITSGDTRHTTAI   |                     |       |    |
| 72. | NM_024250    | Phf10  | P10L             | MAAAGPGAALSPGRCDSDPASP      |                     |       |    |
| 73. | NM_212438    | Wiz    | Q871R            | VNDLQQKLEEVRRPPPRVFPVPSL    |                     |       |    |
| 74. | NM_010390    | H2-Q1  | D219E            | KAHVTHHPRSQGEVTLRCWALGFYP   |                     |       |    |
| 75. | NM_010392    | H2-Q2  | D219E            | KAHVTHHPRSQGEVTLRCWALGFYP   |                     |       |    |
| 76. | NM_010392    | H2-Q2  | D244E            | ADITLTWQLNGEELTQDMELVETRP   | T W Q L N G E E L   | H2-Db | 25 |
| 77. | NM_010391    | H2-Q10 | D222E            | KTHVTHHPSGSEGEVTLRCWALGFYP  |                     |       |    |
| 78. | NM_010787    | Mea1   | A169P            | EDVVQKALQARQPSPAWK          |                     |       |    |

|      |              |         |        |                            |                                                                 |                         |                |
|------|--------------|---------|--------|----------------------------|-----------------------------------------------------------------|-------------------------|----------------|
| 79.  | NM_013664    | Sh3g11  | G85A   | TVSKIRGQVKNPAYPQSEGLLGECM  |                                                                 |                         |                |
| 80.  | NM_001114131 | Ppp4r1  | S562R  | CNISHDTCVPLIRAAEENAEATPDY  |                                                                 |                         |                |
| 81.  | NM_011033    | Pabpc2  | S237C  | DEGGKSKGFGFVCFERHEDAQKAVD  |                                                                 |                         |                |
| 82.  | NM_134137    | Lars    | R1128W | KLMRFDDPLLGPWRVVPVLRHSEK   |                                                                 |                         |                |
| 83.  | NM_001039474 | Tcerg1  | S750T  | MEEAKFNPRATFTEFAAKHAKDSRF  |                                                                 |                         |                |
| 84.  | NM_026386    | Snx2    | K456R  | QQAKNEIREWEARVQQGERDFEQIS  |                                                                 |                         |                |
| 85.  | NM_001198984 | Tcof1   | S79L   | DDETLQAKKSRVLDPVSSSESDQE   |                                                                 |                         |                |
| 86.  | NM_027556    | Cep192  | P292R  | TAHTESEGGHGCRPGTSGCVGTVDN  |                                                                 |                         |                |
| 87.  | NM_027556    | Cep192  | C351R  | GCGGEEIVVKRLRAVDETLRSTYRH  |                                                                 |                         |                |
| 88.  | NM_027556    | Cep192  | V648A  | GFSSGDLNEQSQAQLSEGSVMLKAE  |                                                                 |                         |                |
| 89.  | NM_027556    | Cep192  | T833I  | VCATNSREAETIAAIFCAENIESD   |                                                                 |                         |                |
| 90.  | NM_027556    | Cep192  | P1010T | VLESLSAYHQRTHLESELSQLACS   |                                                                 |                         |                |
| 91.  | NM_027556    | Cep192  | M1327V | PQNLLSTAKFPFVTNCEETPRDSG   |                                                                 |                         |                |
| 92.  | NM_027556    | Cep192  | V1530A | WRCTFTFSKEPIHASLKAAPHADITA |                                                                 |                         |                |
| 93.  | NM_027556    | Cep192  | I1752V | ILSNKQFLTWGGVPLGRTQLKQLAL  |                                                                 |                         |                |
| 94.  | NM_027556    | Cep192  | S1884R | LITMNDLIPGKERKVVFSIRNTGSR  |                                                                 |                         |                |
| 95.  | NM_027556    | Cep192  | T2041A | KITLSVIGEFRGAICSREFLQPSSS  |                                                                 |                         |                |
| 96.  | NM_027556    | Cep192  | I2138T | KTGCFQIINNSVTLKFEELYWPAHC  | Q I I N N S V T L<br>F Q I I N N S V T L<br>Q I I N N S V T L L | H2-Db<br>H2-Db<br>H2-Db | 24<br>28<br>24 |
| 97.  | NM_172967    | Las2    | I94T   | IGNGLQFSSYVHTPDNAFVNLDPKQ  | H T P D N A F V N L                                             | H2-Db                   | 26             |
| 98.  | NM_001136090 | Poli    | G540R  | SPCEPGTSGLSPRSTSHPSGKDCS   |                                                                 |                         |                |
| 99.  | NM_001164168 | Pias2   | T293I  | NYSMSVYLVRQLISAMLLQRLKMKG  |                                                                 |                         |                |
| 100. | NM_001025566 | Chka    | V151G  | VLLRLYGAILKMGSPGFTWEGLVH   |                                                                 |                         |                |
| 101. | NM_016861    | Pdlim1  | K209E  | MLQEKQELNEPPEQSTSFVLQEIL   |                                                                 |                         |                |
| 102. | NM_009826    | Rb1cc1  | D1360G | DKLKSTMQQQERKDLIESLSEDR    |                                                                 |                         |                |
| 103. | NM_001161816 | Gm15455 | P817R  | GIVTPIEAQTRVGGSLGARGSSYG   |                                                                 |                         |                |
| 104. | NM_001161816 | Gm15455 | S765T  | PEPKRRKYGGISTASVDFEQPTRDG  |                                                                 |                         |                |

|      |              |               |        |                            |                                                                 |       |                |
|------|--------------|---------------|--------|----------------------------|-----------------------------------------------------------------|-------|----------------|
| 105. | NM_001161816 | Gm15455       | T731M  | SENELEALEKNDMEQMKYRDRAAER  | A L E K N D M E Q M                                             | H2-Db | 24             |
| 106. | NM_001161816 | Gm15455       | K663E  | VAAYSGESDSEEQERGGPEREKL    |                                                                 |       |                |
| 107. | NM_001161816 | Gm15455       | W534R  | AQSQQYLYWDGERRTYIPALEQSAD  |                                                                 |       |                |
| 108. | NM_001161816 | Gm15455       | Y516S  | YDSQTGLYYDPNSQYYNAQSQQYL   |                                                                 |       |                |
| 109. | NM_001161816 | Gm15455       | A328T  | EGSRINAASVASTAIAAAQWAISSQA |                                                                 |       |                |
| 110. | NM_001161816 | Gm15455       | G311D  | TINVEFAKGSKRDMASNEGSRINAA  | D M A S N E G S R I                                             | H2-Db | 25             |
| 111. | NM_001161816 | Gm15455       | S222N  | LSQGSEPSSENANDTIILRNLNPHS  | S E N A N D T I I<br>P S S E N A N D T I<br>S E N A N D T I I L | H2-Db | 23<br>28<br>21 |
| 112. | NM_001161816 | Gm15455       | N139D  | MHYSDPKPKINEDWLCNKCGVQNFK  | K P K I N E D W L                                               | H2-Db | 22             |
| 113. | NM_001161816 | Gm15455       | N133K  | LGQKVMHYSDPKPKINEDWLCNKC   | K P K I N E D W L                                               | H2-Db | 22             |
| 114. | NM_001161816 | Gm15455       | E40D   | ENRSRDHDYRDMYRSYPREYGRQE   |                                                                 |       |                |
| 115. | NM_010477    | Hspd1         | A120P  | EAGDGTATTATVLRPSIAKEGFEKIS |                                                                 |       |                |
| 116. | NM_007561    | Bmpr2         | P651Q  | HLHATNVAQSIGQTPVCLQLTEEDL  |                                                                 |       |                |
| 117. | NM_145518    | Ndufs1        | V491A  | SALQRDDGAAILAAVSNMVQKIRVT  | A A V S N M V Q K I                                             | H2-Db | 29             |
| 118. | NM_172505    | A730008H23Rik | P591L  | AKSHNTSGASGWL              |                                                                 |       |                |
| 119. | NM_172505    | A730008H23Rik | S371A  | TESWAVDVYRSGAKSPGSRQDVETC  |                                                                 |       |                |
| 120. | NM_198652    | Hjurp         | E146G  | YLTQVDILPQDEGYFKNAEKRGKGD  |                                                                 |       |                |
| 121. | NM_198652    | Hjurp         | L96S   | EGDSESSGADTSSSEENWPSCSSAMR |                                                                 |       |                |
| 122. | NM_177643    | Zfp281        | V843E  | QAFGSQFKSGSREPMFTFITNSNGEV |                                                                 |       |                |
| 123. | NM_023871    | Set           | K131N  | LTRVEVTEFEDINSGYRIDFYFDEN  | F E D I N S G Y R I                                             | H2-Db | 23             |
| 124. | NM_028521    | Phospho2      | V60E   | MGRVFKYLDRDEGEKADELKRAVTSL |                                                                 |       |                |
| 125. | NM_080558    | Ssfa2         | T319A  | KTEKGEKGGSSPAAEKGRTLSISLSE |                                                                 |       |                |
| 126. | NM_080558    | Ssfa2         | I1071M | SPLNVMEPVTELMREQSYLKSELGL  |                                                                 |       |                |
| 127. | NM_008402    | Itgav         | A872G  | PLRIKTPEKNDTGAAGQGERNHLIT  |                                                                 |       |                |
| 128. | NM_008402    | Itgav         | A921S  | TCQVGRDRGKSSILYVKSLLWTET   |                                                                 |       |                |
| 129. | NM_001081260 | Tnks1bp1      | P351A  | SAVLPAPPPGHSASSELPAAEAPET  |                                                                 |       |                |
| 130. | NM_001081260 | Tnks1bp1      | A619V  | AAREEALPVLEPVLGQQQPTPSDQP  |                                                                 |       |                |

|      |              |               |        |                                      |                 |       |    |
|------|--------------|---------------|--------|--------------------------------------|-----------------|-------|----|
| 131. | NM_001081260 | Tnks1bp1      | N941D  | LDIHGSRATAQQDQEFGKSAWFQDY            |                 |       |    |
| 132. | NM_018828    | Fnbp4         | P238S  | PEPKAATPALSSSTASNGSDTAQTP            |                 |       |    |
| 133. | NM_018828    | Fnbp4         | K692Q  | LMPGEEEEESQTQEVVRDESLPKLTV           |                 |       |    |
| 134. | NM_025991    | Kbtbd4        | I34V   | KDRSHSGRVAQGVMKLCLEELFAD             |                 |       |    |
| 135. | NM_025991    | Kbtbd4        | I294V  | KHGGDLYVVGGSVPRRMWKCNNATV            |                 |       |    |
| 136. | NM_008948    | Psmc3         | T9A    | MQEMNLLPAPESPVTRQEKMA                |                 |       |    |
| 137. | NM_007387    | Acp2          | N131S  | AGLFPNNEVQHFSPNISWQPIPVHT            |                 |       |    |
| 138. | NM_001166024 | Arfgap2       | N481D  | GSSAISSSDLFGDMDGAGGGTVSL             |                 |       |    |
| 139. | NM_001033451 | Zfp408        | S205R  | ETCPAKQLDVPSRQCPSIAQTSEPG            |                 |       |    |
| 140. | NM_001145902 | Arhgap1       | D297E  | SLQHLQEKSPGQEPPIPIVLRVAV             |                 |       |    |
| 141. | NM_172669    | Ambra1        | R1230Q | EPGQLAERALSPTASWDQSTSGR              |                 |       |    |
| 142. | NM_138755    | Phf21a        | P240A  | TSIVIATPGTRLAQPQTVQLSKPSL            |                 |       |    |
| 143. | NM_145122    | Pex16         | R268Q  | SLSLSDRKNLTQRERLELRRRTIL             |                 |       |    |
| 144. | NM_007466    | Api5          | T39A   | AYQVILDGVKGGAKKEKRLAAQFIPK           |                 |       |    |
| 145. | NM_007952    | Pdia3         | G420E  | HCKNLEPKYKELEEKLSKDPNIVIA            |                 |       |    |
| 146. | NM_023220    | 2010106G01Rik | A187V  | LVVIFVIAVFTVVLGGYWSGLIELE            |                 |       |    |
| 147. | NM_001163301 | Pxmp3         | G284A  | FLFDIYFTCPKCA TEVHSVQPLKSG           |                 |       |    |
| 148. | NM_026332    | Dnajc19       | K102E  | HPDKGGSPYIAAEINEAKDLLEGQA            |                 |       |    |
| 149. | NM_172681    | D930015E06Rik | S563A  | SGDACRRNVLGMAQFAFTKKSKETE            |                 |       |    |
| 150. | NM_029797    | Mnd1          | C147G  | QQLKAEVEKYREGDPQVVEEIREAN            |                 |       |    |
| 151. | NM_001177773 | Fbxw7         | N63D   | EHTARNGELVGDPRPGDQNDTQQG             |                 |       |    |
| 152. | NM_016959    | Rps3a         | D108G  | CLTNFHGMDLTRGKMCSMVKKWQTM            |                 |       |    |
| 153. | NM_001083318 | Etv3          | M410I  | QGKEEQTQEVDSIRSRTIEEGKGTG            |                 |       |    |
| 154. | NM_001083318 | Etv3          | V454A  | PLEGTEDESDRSAREPGVPEKKEDA            |                 |       |    |
| 155. | NM_001003912 | Arhgef11      | M147T  | NPSSLGGPRVNP T I P P P P P P P L P P |                 |       |    |
| 156. | NM_001003912 | Arhgef11      | S806A  | MKKENLMPREELARLFPNLPELIEI            | L A R L F P N L | H2-Kb | 23 |
| 157. | NM_001003912 | Arhgef11      | Y933H  | NI IKHTAGGTSEHEKLCRARDQCRE           |                 |       |    |
| 158. | NM_028460    | Pear1         | E876D  | LPADWKHRREPHDRGASHLDRSYSC            |                 |       |    |

|      |              |         |        |                            |                   |       |    |
|------|--------------|---------|--------|----------------------------|-------------------|-------|----|
| 159. | NM_028460    | Pear1   | T160A  | CGNSSCDPKSGACFCPSGLQPPNC   |                   |       |    |
| 160. | NM_033573    | Prcc    | G34E   | EPEEEDVAAPMPEPTLGGLFASLPA  | A A P M P E P T L | H2-Db | 20 |
| 161. | NM_177663    | Isg2012 | Q90R   | KKEAAAASKRDSERSKDKKAPLSWLT |                   |       |    |
| 162. | NM_177663    | Isg2012 | P172L  | GSKKKPLKKNVNLNSTQARSEDKCP  |                   |       |    |
| 163. | NM_016701    | Nes     | R319G  | LEAENSRLQTPGGSSQASLGFPDPK  |                   |       |    |
| 164. | NM_016701    | Nes     | T458S  | GGEQPDHFPDDPSLAPPLNPHHSI   |                   |       |    |
| 165. | NM_016701    | Nes     | M535K  | TEEIQDSQGPLQKETLEALGDKPL   |                   |       |    |
| 166. | NM_016701    | Nes     | E544K  | PLQKETLEALGDKPLMSLKTQNHET  |                   |       |    |
| 167. | NM_016701    | Nes     | S570L  | GKENCNSSIEENLGTVK SPEKEKQT | S I E E N L G T V | H2-Db | 22 |
| 168. | NM_016701    | Nes     | L587S  | SPEKEKQTPPKSSSEKNVEAEKMLE  |                   |       |    |
| 169. | NM_016701    | Nes     | M673I  | QYPLGGPEAEDQILERLVEKEDQRF  |                   |       |    |
| 170. | NM_016701    | Nes     | E734D  | EKERQESLKSPEDEDQQAFLLEKE   |                   |       |    |
| 171. | NM_016701    | Nes     | E778D  | EKERQESLKSPEDEDQQAFLLEKE   |                   |       |    |
| 172. | NM_016701    | Nes     | E900D  | EKENVQSPRYLEDHMIKSLLLEDK   |                   |       |    |
| 173. | NM_016701    | Nes     | R1008G | AESKLENESQDSGKSLEDESQETFG  |                   |       |    |
| 174. | NM_016701    | Nes     | A1591V | QGEARKEGWSPAVLAAQGLSDPPEE  |                   |       |    |
| 175. | NM_016701    | Nes     | T1684A | EDADEEEGAESGAQWWGPGPSGGGV  |                   |       |    |
| 176. | NM_001198913 | Arhgef2 | M650T  | KDLLLGPCVDLPTTSREPALPLDSD  |                   |       |    |
| 177. | NM_027389    | Gon4l   | A1062S | GVRGEDGFESPTSLPAMP CGSEART |                   |       |    |
| 178. | NM_027389    | Gon4l   | S1374R | ELDSESPQEKPSRASEMSKQTVLQR  |                   |       |    |
| 179. | NM_027389    | Gon4l   | M1389T | EMSKQTVLQREDTQAAKSPSPVQDA  |                   |       |    |
| 180. | NM_027389    | Gon4l   | S2051P | SETERLPETVEHPAPLPSPVSTRTR  |                   |       |    |
| 181. | NM_144898    | Msto1   | D106E  | AVAWQKGLSTHREDAQPKNPNLQGL  |                   |       |    |
| 182. | NM_138679    | Ash1l   | R51W   | IEGATEEEDPRKWNRRERGTEAGKED |                   |       |    |
| 183. | NM_138679    | Ash1l   | S1668F | SLAGSQSASDKPQRSSESTNCSPPT  |                   |       |    |
| 184. | NM_138679    | Ash1l   | S1706C | NGVPSRSPRLVACMDDSVDSLQRI   |                   |       |    |
| 185. | NM_007712    | Clk2    | Q188R  | VVQCVDHRRGGTRVALKI IKNVEKY |                   |       |    |
| 186. | NM_029937    | Nup210l | I1084V | PRHIEVFPPFRLVPEKMTLIATNMM  |                   |       |    |



|      |              |               |        |                            |                                                               |                |                |
|------|--------------|---------------|--------|----------------------------|---------------------------------------------------------------|----------------|----------------|
| 187. | NM_029937    | Nup210l       | N1528S | QTDATGVGVARSPGTATIFHNIPG   |                                                               |                |                |
| 188. | NM_029937    | Nup210l       | T1843I | KVQTIPVVYVPTIGTTQPGSYTATC  |                                                               |                |                |
| 189. | NM_026677    | Rab13         | K196N  | PSSTGLKTSDDKNNKCLLG        | S D K K N N K C L<br>D K K N N K C L L<br>S D K K N N K C L L | H2-Db<br>H2-Db | 22<br>20<br>23 |
| 190. | NM_001037711 | Cgn           | A1034P | RLASSEGFQKPSPLSQLESQNQLL   |                                                               |                |                |
| 191. | NM_001037711 | Cgn           | R774Q  | EKQQLEELNAAQEEEGNLAALKRA   |                                                               |                |                |
| 192. | NM_001037711 | Cgn           | Q647R  | AEQQNQEVTVGRHRNQVLEKQLAALR |                                                               |                |                |
| 193. | NM_001037711 | Cgn           | N238Y  | SANHWTRGTYDYHVDSSKNPSQKQ   |                                                               |                |                |
| 194. | NM_017395    | Rfx5          | R569Q  | GRPEGPGGGEAEQETVLVQGGQDG   |                                                               |                |                |
| 195. | NM_009336    | Vps72         | R99C   | KAYKEPLKSLRPKVSTPASSSQA    |                                                               |                |                |
| 196. | NM_009336    | Vps72         | A247V  | EGLDPAPTASALVPHAGTGTGAAAA  |                                                               |                |                |
| 197. | NM_023320    | Plekho1       | P251S  | LSRPWEKPKGASVTPQALKKFPST   |                                                               |                |                |
| 198. | NM_177145    | Pde4dip       | V114M  | KYEVSREDVYKRMSESSAPGTVCP   |                                                               |                |                |
| 199. | NM_001029836 | Npnt          | G67R   | QCQPVCQPQCKHRECVGPNKCKCHP  |                                                               |                |                |
| 200. | NM_025669    | Sfrs18        | R476G  | NSLSLLEASEADGDAVNDKKRTPNE  |                                                               |                |                |
| 201. | NM_026871    | Hint2         | V81I   | LYEDQQCLVFRDIAPQAPVHFLVIP  |                                                               |                |                |
| 202. | NM_173400    | Haus6         | P850S  | PKTLEQHKVELSSVAKAVQADDAHT  |                                                               |                |                |
| 203. | NM_007408    | Plin2         | L183M  | NSGVDNAITKSEMVDQYFPLTQEE   |                                                               |                |                |
| 204. | NM_184088    | Dennd4        | A1149V | EPVVGDNVAETAVENTCNSLQSNH   |                                                               |                |                |
| 205. | NM_184088    | Dennd4        | N1177H | SRDTQAGAQPVHKRSSSYATRKA    |                                                               |                |                |
| 206. | NM_184088    | Dennd4        | V1613I | ESSDEIKKTNGDIQSVKMSSVPNSL  |                                                               |                |                |
| 207. | NM_026368    | 5830433M19Rik | V221G  | STSSLRENKQPEGLESKQGGEDSD   |                                                               |                |                |
| 208. | NM_172696    | Inadl         | A961P  | DMMEETFGLDSRPPIPSSEGNQHG   |                                                               |                |                |
| 209. | NM_172696    | Inadl         | A1509T | IVIHEVYEEGAATRDGRLWAGDQIL  |                                                               |                |                |
| 210. | NM_001081264 | Alg6          | F231S  | FKKGLKGLLALSIRIACVTLASFL   |                                                               |                |                |
| 211. | NM_028132    | Pgm2          | V525I  | TIRLYIDSYEKDIKINQDPQVMLA   |                                                               |                |                |
| 212. | NM_175036    | Leprot        | D92G   | SAFGLPVVLARVGIKWGACGLVLA   |                                                               |                |                |

|      |              |         |        |                             |                                      |                |          |
|------|--------------|---------|--------|-----------------------------|--------------------------------------|----------------|----------|
| 213. | NM_025647    | Cmpk1   | K202E  | TKPIIDLYEEMGEVKKIDASKSVDE   |                                      |                |          |
| 214. | NM_009185    | Stil    | L374V  | SKTLPVKRSSQKVSPGKIPINKHDT   |                                      |                |          |
| 215. | NM_009185    | Stil    | M686T  | SCVPHPCAMCMHTPNTAPDNGMMGL   |                                      |                |          |
| 216. | NM_009185    | Stil    | V740M  | SLDPGSHKT VATMEDTVKAAKQ MEL |                                      |                |          |
| 217. | NM_009185    | Stil    | R942H  | TEEPPTKAVVTNHECAKTQNTHHAR   |                                      |                |          |
| 218. | NM_008126    | Gjb3    | T85M   | NIRLWALQLIFVMCPSMLVILHVAY   |                                      |                |          |
| 219. | NM_194462    | Akap9   | I2244M | KEIEIDRLNEQFMKLQQQLKLTNDN   | I D R L N E Q F M<br>L N E Q F M K L | H2-Db<br>H2-Kb | 21<br>23 |
| 220. | NM_194462    | Akap9   | K2980E | EIEDLRAQINGGEMTLEREQGT EKS  | R A Q I N G G E M                    | H2-Db          | 24       |
| 221. | NM_018878    | Paxip1  | P994S  | VECAGGKVLAKQSSFRKLMEHKQNK   | K Q S S F R K L                      | H2-Kb          | 22       |
| 222. | NM_001037940 | Dnajb6  | D63E   | EAYEVLSDAKKREIYDKYGKEGLNG   |                                      |                |          |
| 223. | NM_001081422 | Bod11   | T1529A | ATTSSEVGEKGAALPCTSIEADEG    |                                      |                |          |
| 224. | NM_172146    | Ppat    | I208M  | AVRDPYGNRPLCMGRMLPVSVDVNDK  | D P Y G N R P L C M                  | H2-Db          | 20       |
| 225. | NM_028298    | Zfp655  | Q60K   | PISKPDGISEREKDLQVFDLESKNR   |                                      |                |          |
| 226. | NM_018810    | Mkrm1   | N346Y  | CRITSNFVIPSEYWVEEKEEKQKLI   |                                      |                |          |
| 227. | NM_133930    | Crel d1 | Y328N  | GENEKCENTEGGNRCVCAEGYRQED   |                                      |                |          |
| 228. | NM_013546    | Hebp1   | L86V   | VGMGMTVPVSFAVFPNEDGSLQKKL   | A V F P N E D G S L                  | H2-Db          | 22       |
| 229. | NM_021284    | Kras    | G12V   | MTEYKLVVVGAVGVGKSALTIQLI    |                                      |                |          |
| 230. | NM_001081113 | Ipo8    | A578S  | LICEYSQDVASISVDTTQHLAEIFG   |                                      |                |          |
| 231. | NM_177192    | Dennd5b | E817K  | HLLQFQDREKQKHLTDSPVALGPE    |                                      |                |          |
| 232. | NM_010418    | Herc2   | G1235D | GGFWTVIDGKVYDIKDFQTQSLTGN   |                                      |                |          |
| 233. | NM_001081345 | Chd2    | T647A  | DFKSNHRLITGAPLQNSLKELWSL    | A P L Q N S L K E L                  | H2-Db          | 27       |
| 234. | NM_028801    | Muc5b   | Y1769H | PSVVTARSTSQGHS LPPSSPHTTNS  |                                      |                |          |
| 235. | NM_028801    | Muc5b   | F1861S | SASSTAGPGTQTSSTTCQPQCQWTK   |                                      |                |          |
| 236. | NM_198031    | Tubgcp3 | G190S  | FLPGQSHQAPGVSDGLRQQLGPRLA   |                                      |                |          |
| 237. | NM_181854    | Zfp828  | C170S  | AGPLISPPEQAPSLPAEASKAAPVP   |                                      |                |          |
| 238. | NM_181854    | Zfp828  | P244T  | ALSPESPVLATSTEPWGP SLSASPE  |                                      |                |          |
| 239. | NM_181854    | Zfp828  | F549L  | KRALFPESRKHVLLPELPKSAVFS D  |                                      |                |          |

|      |              |               |       |                                             |                                          |                |          |
|------|--------------|---------------|-------|---------------------------------------------|------------------------------------------|----------------|----------|
| 240. | NM_172751    | Arhgef10      | M207I | ARWAADPANTAWIENPEEAIYDDVP                   | A W I E N P E E A<br>A W I E N P E E A I | H2-Db<br>H2-Db | 20<br>28 |
| 241. | NM_172751    | Arhgef10      | G348R | GLEKTKAAVKRGRSFIRTRSLVSQD                   | A A V K R G R S F I                      | H2-Db          | 20       |
| 242. | NM_001081149 | Myst3         | H555R | LKYMKSRTILQQRMKKCGWFHPPAN                   |                                          |                |          |
| 243. | NM_001205054 | Aga           | L54M  | AAWWTLLSGGSAMDAVENGCAVCEK                   |                                          |                |          |
| 244. | NM_001205054 | Aga           | S193P | PYKPSGFLKQSI PPKHEEVDIHSHD                  |                                          |                |          |
| 245. | NM_146208    | Neil3         | M510V | HHSKSDGSP LCKVHHRRCVLRVVRK                  |                                          |                |          |
| 246. | NM_146208    | Neil3         | P90H  | ETLGKELFMYFGHRALRIHFGMKGS                   |                                          |                |          |
| 247. | NM_001013379 | Zfp930        | S424G | CNQCCKAFSEPSGLQMHKRTHNGEK                   |                                          |                |          |
| 248. | NM_172410    | Nup93         | S247G | LTPATDALKSRSGVEVRMDFVKQAL                   |                                          |                |          |
| 249. | NM_133954    | AA960436      | V211I | DLTTFYQDPSFHI SLAWCVGDASLQ                  |                                          |                |          |
| 250. | NM_009864    | Cdh1          | P267Q | TDQNDNRPEFTQQVFEGFVAEGAVP                   |                                          |                |          |
| 251. | NM_139229    | Cog8          | L580I | VFCLDEQELGPDIVAPAPELPAEQR                   |                                          |                |          |
| 252. | NM_001083118 | Terf2         | K426E | STEPSPGLNSSHEAMSASKPRALNQ                   |                                          |                |          |
| 253. | NM_178380    | Dhx38         | R59W  | SLGLD L L A S L K W R E R E E K D D G E D K |                                          |                |          |
| 254. | NM_177700    | Atmin         | M554V | PPQSDPKILGQVVEKSAPVLNFSAQ                   |                                          |                |          |
| 255. | NM_177700    | Atmin         | T565A | VVEKSAPVLNFSAQNGLLPAHTMTD                   |                                          |                |          |
| 256. | NM_026572    | Gcsh          | M152L | WLKMTLSDPSELDELMSEEAYEKY                    |                                          |                |          |
| 257. | NM_026572    | Gcsh          | T21A  | LRVVAYSLRTALAFCSRPCVPSAA                    |                                          |                |          |
| 258. | NM_172924    | C230081A13Rik | T413M | SLTSKSSVKVPEMHKAVLALRLQEK                   |                                          |                |          |
| 259. | NM_033607    | Uchl4         | Y140F | ESVSMSP EERAKFLENYDAIRVTHE                  | K F L E N Y D A I                        | H2-Db          | 26       |
| 260. | NM_033607    | Uchl4         | W189R | VHVDGHL YELDGRKPPFINHGKTS                   |                                          |                |          |
| 261. | NM_008182    | Gsta2         | T96S  | KDMKERALIDMYS E G I L D L T E M I G Q       |                                          |                |          |
| 262. | NM_008182    | Gsta2         | V66A  | QVPMVEIDGMKLAQTRAILNYIATK                   |                                          |                |          |
| 263. | NM_008182    | Gsta2         | Y9H   | MAGKPV L H H F N A R G R M E C I R W        | L H H F N A R G R M                      | H2-Db          | 22       |
| 264. | NM_001039147 | Morf411       | A177D | TSETPQP P R K R D R V D P T V E N E E T F   |                                          |                |          |
| 265. | NM_027918    | 1300017J02Rik | K396N | EETPEDCIAATMNGEADAMSLDGGF                   |                                          |                |          |
| 266. | NM_173019    | Pfkfb4        | I169F | SICVDPEVVAANFVQVKLGSPDYVN                   |                                          |                |          |

|      |           |       |        |                                                                                                                                                             |  |  |  |
|------|-----------|-------|--------|-------------------------------------------------------------------------------------------------------------------------------------------------------------|--|--|--|
| 267. | NM_010918 | Nktr  | C194R  | KDVF <del>E</del> K <del>R</del> K <del>R</del> K <del>P</del> T <del>R</del> SE <del>G</del> S <del>D</del> S <del>S</del> S <del>R</del> S <del>S</del> S |  |  |  |
| 268. | NM_010918 | Nktr  | Q1170H | DE <del>C</del> MA <del>H</del> PRAG <del>G</del> E <del>H</del> ESS <del>M</del> SE <del>S</del> K <del>T</del> L <del>G</del> E                           |  |  |  |
| 269. | NM_010918 | Nktr  | A1236P | GN <del>L</del> S <del>V</del> STATT <del>S</del> S <del>P</del> LD <del>V</del> KALSTVPEV                                                                  |  |  |  |
| 270. | NM_010620 | Kif15 | G77D   | PDPK <del>T</del> F <del>V</del> F <del>D</del> Y <del>V</del> AD <del>M</del> DTTQESV <del>F</del> STV                                                     |  |  |  |
| 271. | NM_010620 | Kif15 | H474Q  | FREDQIM <del>R</del> LER <del>L</del> Q <del>K</del> EGRGSFLPEEQ                                                                                            |  |  |  |
| 272. | NM_153168 | Lars2 | R22G   | FYV <del>S</del> PL <del>K</del> R <del>Q</del> L <del>V</del> S <del>G</del> PPVILWERLIPG                                                                  |  |  |  |
| 273. | NM_153168 | Lars2 | D863N  | KIPV <del>P</del> Q <del>H</del> V <del>A</del> Q <del>D</del> Q <del>N</del> KVHELVLQSELG                                                                  |  |  |  |
| 274. | NM_008784 | Igbp1 | A264P  | QAKV <del>F</del> G <del>T</del> G <del>Y</del> P <del>S</del> L <del>P</del> TMTVSDWYEQHQ                                                                  |  |  |  |

Table S2

| no. | gene name | mutation         | min. predicted epitope | MHC class | SYFPEITHI score |
|-----|-----------|------------------|------------------------|-----------|-----------------|
| 1.  | Aim1      | R893H            | F N S S N T S R L      | H2-Db     | 25              |
| 2.  | Grn       | C80R             | R P <u>A</u> G Y S C L | H2-Kb     | 22              |
| 3.  | Cdc27     | D105N            | K S H D N L V T E F    | H2-Db     | 28              |
| 4.  | Sp4       | H42Q             | S Q P S P L A L L      | H2-Db     | 20              |
| 5.  | Lyst      | S1467N           | S E G F N V S L W F    | H2-Db     | 21              |
| 6.  | Rpp40     | S58N             | K E L K N L V M D I    | H2-Db     | 26              |
| 7.  | Naip2     | Y540N            | C P L L N R F Q L      | H2-Db     | 22              |
| 8.  | Naip2     | Y540N            | C P L L N R F Q L V    | H2-Db     | 20              |
| 9.  | Rad1      | Q263R            | Y M I R N E D G R I    | H2-Db     | 26              |
| 10. | Acot10    | T177S            | S W V G N T S M E V    | H2-Db     | 22              |
| 11. | Acot10    | L140P            | M H N H N H S T K M    | H2-Db     | 22              |
| 12. | Zhx2      | L70P             | S M G E N P S K K L    | H2-Db     | 27              |
| 13. | Muc4      | T804A            | S A P I T S T Q I      | H2-Db     | 20              |
| 14. | H2-Q2     | D244E            | T W Q L N G E E L      | H2-Db     | 25              |
| 15. | Cep192    | I2138T           | Q I I N N S V T L      | H2-Db     | 24              |
| 16. | Cep192    | I2138T           | F Q I I N N S V T L    | H2-Db     | 28              |
| 17. | Cep192    | I2138T           | Q I I N N S V T L L    | H2-Db     | 24              |
| 18. | Las2      | I94T             | H T P D N A F V N L    | H2-Db     | 26              |
| 19. | Gm15455   | T731M            | A L E K N D M E Q M    | H2-Db     | 24              |
| 20. | Gm15455   | G311D            | D M A S N E G S R I    | H2-Db     | 25              |
| 21. | Gm15455   | S222N            | S E N A N D T I I      | H2-Db     | 23              |
| 22. | Gm15455   | S222N            | P S S E N A N D T I    | H2-Db     | 28              |
| 23. | Gm15455   | S222N            | S E N A N D T I I L    | H2-Db     | 21              |
| 24. | Gm15455   | N139D+<br>NK133K | K P K I N E D W L      | H2-Db     | 22              |
| 25. | Ndufs1    | V491A            | A A V S N M V Q K I    | H2-Db     | 29              |
| 26. | Set       | K131N            | F E D I N S G Y R I    | H2-Db     | 23              |
| 27. | Arhgef11  | S806A            | L A R L F P N L        | H2-Kb     | 23              |
| 28. | Prc       | G34E             | A A P M P E P T L      | H2-Db     | 20              |
| 29. | Nes       | S570L            | S I E E N L G T V      | H2-Db     | 22              |
| 30. | Rab13     | K196N            | S D K K N N K C L      | H2-Db     | 22              |
| 31. | Rab13     | K196N            | D K K N N K C L L      | H2-Db     | 20              |
| 32. | Rab13     | K196N            | S D K K N N K C L L    | H2-Db     | 23              |
| 33. | Akap9     | I2244M           | I D R L N E Q F M      | H2-Kb     | 21              |
| 34. | Akap9     | I2244M           | L N <u>E</u> Q F M K L | H2-Db     | 23              |
| 35. | Akap9     | K2980E           | R A Q I N G G E M      | H2-Db     | 24              |
| 36. | Paxip1    | P994S            | K Q <u>S</u> S F R K L | H2-Kb     | 22              |
| 37. | Ppat      | I208M            | D P Y G N R P L C M    | H2-Db     | 20              |
| 38. | Hebp1     | L86V             | A V F P N E D G S L    | H2-Db     | 22              |
| 39. | Chd2      | T647A            | A P L Q N S L K E L    | H2-Db     | 27              |
| 40. | Arhgef10  | M207I            | A W I E N P E E A      | H2-Db     | 20              |
| 41. | Arhgef10  | M207I            | A W I E N P E E A I    | H2-Db     | 28              |
| 42. | Arhgef10  | G348R            | A A V K R G R S F I    | H2-Db     | 20              |

|     |       |       |                     |       |    |
|-----|-------|-------|---------------------|-------|----|
| 43. | Uchl4 | Y140F | K F L E N Y D A I   | H2-Db | 26 |
| 44. | Gsta2 | Y9H   | L H H F N A R G R M | H2-Db | 22 |
